# Supplementary material for: Community health workers’ involvement in the prevention and control of non-communicable diseases in Wakiso District, Uganda
Source: PubMed Central journal article supplement (PMC7791672; doi:10.1186/s12992-020-00653-5), 2021-01-07
Supplement: 12992_2020_653_MOESM1_ESM.pdf [file 12992_2020_653_MOESM1_ESM.pdf]

**KNOWLEDGE, ATTITUDES AND PRACTICES OF VILLAGE HEALTH TEAMS ON  
NON-COMMUNICABLE DISEASES**

**Demographic / general information**

| <b>No.</b> | <b>Prompt</b>                                                                                            | <b>Response</b>                                                                                                                        |
|------------|----------------------------------------------------------------------------------------------------------|----------------------------------------------------------------------------------------------------------------------------------------|
| 1.         | Sub county / town council                                                                                | 1 = Ssis / Kajjansi<br>2 = Kasanje<br>3 = Katabi<br>4 = Bussi                                                                          |
| 2.         | Age <i>(provide completed years)</i>                                                                     | .....                                                                                                                                  |
| 3.         | Sex                                                                                                      | 1 = Male<br>2 = Female                                                                                                                 |
| 4.         | Religion                                                                                                 | 1 = Catholic<br>2 = Anglican<br>3 = Muslim<br>4 = Pentecostal<br>5 = Seventh Day Adventists (SDA)<br>6 = Other (specify) .....         |
| 5.         | What is the highest level of education you attained?                                                     | 1 = None<br>2 = Pre-primary<br>3 = Primary (P1 to P7)<br>4 = O level (S1 to S4)<br>5 = A level (S5 to S6)<br>6 = Tertiary / university |
| 6.         | How long have you worked as a VHT?<br><br><i>(Record 0 if less than 1 year. Provide completed years)</i> | .....                                                                                                                                  |
| 7.         | What is your marital status?                                                                             | 1 = Married / cohabiting<br>2 = Single<br>3 = Widowed<br>4 = Divorced / separated                                                      |
| 8.         | Are you involved in treatment of childhood illnesses?                                                    | 1 = Yes<br>2 = No                                                                                                                      |

### Knowledge on NCDs

| No. | Prompt                                                                 | Response                                                                                                                                                                                                                           |
|-----|------------------------------------------------------------------------|------------------------------------------------------------------------------------------------------------------------------------------------------------------------------------------------------------------------------------|
| 9.  | Do you know what NCDs are?<br><i>(Probe to confirm yes response)</i>   | 1 = Yes<br>2 = No <i>(Define what NCDs are in simple terms)</i>                                                                                                                                                                    |
| 10. | Do you know any examples of NCDs?                                      | 1 = Yes<br>2 = No <i>(Skip to 12)</i>                                                                                                                                                                                              |
| 11. | Which NCDs are you aware of?<br><br><i>(Multiple answers possible)</i> | 1 = Cancer<br>2 = Diabetes<br>3 = High blood pressure<br>4 = Cardiovascular diseases<br>5 = Mental health conditions (such as epilepsy)<br>6 = Chronic respiratory diseases<br>7 = Sickle cell anemia<br>8 = Other (specify) ..... |
| 12. | Can NCDs be prevented?                                                 | 1 = Yes<br>2 = No <i>(Skip to 14)</i>                                                                                                                                                                                              |
| 13. | How can NCDs be prevented?<br><br><i>(Multiple answers possible)</i>   | 1 = Preventing smoking / tobacco use<br>2 = Regular physical activity<br>3 = Proper diet<br>4 = Limiting alcohol consumption<br>5 = Reducing environmental exposures<br>6 = Other (specify) .....                                  |
| 14. | Can NCDs be treated?                                                   | 1 = Yes<br>2 = No                                                                                                                                                                                                                  |

### Attitudes towards NCDs

| No. | Prompt                                                                                  | Response                                                                                            |
|-----|-----------------------------------------------------------------------------------------|-----------------------------------------------------------------------------------------------------|
| 15. | NCDs are common among people in your community.                                         | 1 = Agree    2 = Neither agree nor disagree<br>3 = Disagree                                         |
| 16. | How important are these behavioural risk factors in the prevention of NCDs?             |                                                                                                     |
|     | (a) Avoiding smoking / tobacco use                                                      | 1 = Very important    2 = Important    3 = Fairly important<br>4 = Not important                    |
|     | (b) Limiting alcohol use                                                                | 1 = Very important    2 = Important    3 = Fairly important<br>4 = Not important                    |
|     | (c) Physical activity                                                                   | 1 = Very important    2 = Important    3 = Fairly important<br>4 = Not important                    |
|     | (d) Healthy diet                                                                        | 1 = Very important    2 = Important    3 = Fairly important<br>4 = Not important                    |
| 17. | VHTs have a role they can play in the prevention and control of NCDs in your community? | 1 = Agree    2 = Neither agree nor disagree <i>(Skip to 19)</i><br>3 = Disagree <i>(Skip to 19)</i> |

|     |                                                                                                                            |                                                                                                                                                                                             |
|-----|----------------------------------------------------------------------------------------------------------------------------|---------------------------------------------------------------------------------------------------------------------------------------------------------------------------------------------|
| 18. | What role can VHTs play in the prevention and control of NCDs in your community?<br><br><i>(Multiple answers possible)</i> | 1. Health education<br>2. Community mobilization for interventions<br>3. Early detection<br>4. Screening<br>5. Referral<br>6. Supporting adherence to treatment<br>7. Other (specify) ..... |
|-----|----------------------------------------------------------------------------------------------------------------------------|---------------------------------------------------------------------------------------------------------------------------------------------------------------------------------------------|

### Practices

| No. | Prompt                                                                                                         | Response                                                                                                                                                                                           |
|-----|----------------------------------------------------------------------------------------------------------------|----------------------------------------------------------------------------------------------------------------------------------------------------------------------------------------------------|
| 19. | Have you ever been involved in prevention or control of NCDs in your community?                                | 1 = Yes<br>2 = No ( <i>Skip to 24</i> )                                                                                                                                                            |
| 20. | In what ways have you been involved in prevention or control of NCDs in your community?                        | 1 = Health education<br>2 = Community mobilization for interventions<br>3 = Early detection<br>4 = Screening<br>5 = Referral<br>6 = Supporting adherence to treatment<br>7 = Other (specify) ..... |
| 21. | Which NCDs have you been involved in their prevention or control?<br><br><i>(Multiple answers possible)</i>    | 1 = Cancer<br>2 = Diabetes<br>3 = High blood pressure<br>4 = Cardiovascular diseases<br>5 = Other (specify) .....                                                                                  |
| 22. | Have you faced any challenges during your involvement in prevention or control of NCDs?                        | 1 = Yes<br>2 = No ( <i>Skip to 24</i> )                                                                                                                                                            |
| 23. | What challenges have you faced during your involvement in the prevention or control of NCDs in your community? | 1 = Low knowledge<br>2 = Lack of training on NCDs<br>3 = Poor community perception towards NCDs<br>4 = Lack of support from health workers<br>5 = Other (specify) .....                            |
| 24. | Have you ever received any training in NCD prevention or control?                                              | 1 = Yes                      2 = No ( <i>End interview</i> )                                                                                                                                       |
| 25. | Who organised the training (s)?<br><br><i>(Multiple answers possible)</i>                                      | 1 = Ministry of Health<br>2 = District health office / health facility<br>3 = Non-governmental Organization<br>4 = University<br>5 = Other (specify) .....                                         |

**Thank you very much for your time.**

Name of data collector: .....
